# Supplementary material for: The Association of Birth Weight and Infant Growth with Energy Balance-Related Behavior – A Systematic Review and Best-Evidence Synthesis of Human Studies
Source: PubMed Central journal article supplement (PMC5232347; doi:10.1371/journal.pone.0168186), 2017-01-12
Supplement: pone.0168186.s002.pdf [file pone.0168186.s002.pdf]

# Online Supplementary Material to the article:

## **The Association of Birth weight and Infant growth with Energy Balance-Related Behavior – A Systematic Review and Best-evidence Synthesis of Human Studies**

Arend W. van Deutekom<sup>1</sup>; Mai J.M. Chinapaw<sup>2</sup>; E. (Ilse) P. Jansma<sup>3</sup>; Tanja G.M. Vrijkotte<sup>4</sup>; Reinoud J.B.J. Gemke<sup>1</sup>

<sup>1</sup> *Department of Pediatrics, EMGO Institute for Health & Care Research, Institute for Cardiovascular Research VU, VU University Medical Center, Amsterdam, the Netherlands;* <sup>2</sup> *Department of Public and Occupational Health, EMGO institute for Health & Care Research, VU University Medical Center, Amsterdam, the Netherlands;* <sup>3</sup> *Department of Epidemiology and Biostatistics, EMGO institute for Health & Care Research, VU University Medical Centre, Amsterdam, Netherlands;* <sup>4</sup> *Department of Public Health, Academic Medical Centre, University of Amsterdam, Amsterdam, the Netherlands.*

**Full literature search and number of references:**

|                            |              |                   |                   |
|----------------------------|--------------|-------------------|-------------------|
| <b>Search date</b>         | : 15-01-2013 | update 03-07-2014 | update 19-05-2015 |
| Pubmed                     | : 2898       | 3275              | 3514              |
| Embase                     | : 2356       | 3773              | 2879              |
| PsycInfo                   | : 490        | 527               | 548               |
| Cochrane                   | : 705        | 402               | 482               |
| <b>Total</b>               | : 6449       | 7977              | 7423              |
| <b>After deduplication</b> | : 5530       | 6853              | 6231              |

| Search date                | 15-1-2013 | Update 3-7-2014 | Update 19-5-2015 | Update 5-1-2016 |
|----------------------------|-----------|-----------------|------------------|-----------------|
| Pubmed                     | 2898      | 3275            | 3514             | 3724            |
| Embase                     | 2356      | 3773            | 2879             | 3061            |
| PsycInfo                   | 490       | 527             | 548              | 577             |
| Cochrane                   | 705       | 402             | 482              | 545             |
| <b>Total</b>               | 6369      | 7977            | 7423             | 7907            |
| <b>After deduplication</b> | 5530      | 6853            | 6231             | 6688            |

**Methods:** Liberati et al., The PRISMA statement for reporting systematic reviews and meta-analyses of studies that evaluate health care interventions: explanation and elaboration. 2009, Journal of Clinical Epidemiology; 62: e1-e34.

## **1. Pubmed**

### **#1 Perinatal influences**

Birth weight[Mesh] OR "Infant, Low Birth Weight"[Mesh] OR "Prenatal Exposure Delayed Effects"[Mesh] OR dohad[tiab] OR (("Birth weight"[tiab] OR "Perinatal"[tiab] OR "infant growth"[tiab] OR "fetal"[tiab] OR "intra-uterine growth"[tiab] OR "infant programming"[tiab] OR "intra-uterine programming"[tiab] OR "developmental programming"[tiab] OR "intra-uterine plasticity"[tiab] OR "developmental plasticity"[tiab] OR developmental origin\*[tiab] OR early-life origin\*[tiab] OR intra-uterine origin\*[tiab] OR developmental influence\*[tiab] OR early-life influence\*[tiab] OR intra-uterine influence\*[tiab] OR famine[tiab] OR "catch-up growth"[tiab] OR "accelerated growth"[tiab] OR "Small for Gestational Age"[tiab] OR dysmaturity[tiab]) NOT medline[sb])

### **#2 Energy-balance related behavior**

*Physical activity - Sedentary behavior - Eating behavior - Energy intake*

"Exercise"[Majr:NoExp] OR "Running"[Mesh] OR "Swimming"[Mesh:noexp] OR "Walking"[Mesh:noexp] OR "Sports"[Mesh] OR "Life Style"[Mesh:NoExp] OR "Sedentary Lifestyle"[Mesh] OR "Appetite"[Mesh] OR "Health Behavior"[Majr:NoExp] OR "Feeding Behavior"[Mesh] OR "physical activity"[tiab] OR appetit\*[tiab] OR satiety[tiab] OR "childhood diet"[tiab] OR ((sport\*[tiab] OR exercise\*[tiab] OR "activity level"[tiab] OR "motor activity"[tiab] OR "locomotor activity"[tiab] OR "sedentary"[tiab] OR sedentarism[tiab] OR sedentariness[tiab] OR "physical inactivity"[tiab] OR "sitting"[tiab] OR "diet behavior"[tiab] OR "dietary behavior"[tiab] OR "feeding behavior"[tiab] OR "appetitive behavior"[tiab] OR "diet behaviour"[tiab] OR "dietary behaviour"[tiab] OR "feeding behaviour"[tiab] OR "appetitive behaviour"[tiab] OR diet preference\*[tiab] OR dietary preference\*[tiab] OR feeding preference\*[tiab] OR diet habit\*[tiab] OR dietary habit\*[tiab] OR feeding habit\*[tiab] OR "feeding practice"[tiab] OR "feeding practices"[tiab] OR "diet regulation"[tiab] OR "feeding regulation"[tiab] OR "diet control"[tiab] OR "dietary control"[tiab] OR "feeding control"[tiab] OR hunger[tiab] OR hyperphagia[tiab] OR hyperphagic[tiab] OR "energy expenditure"[tiab] OR "energy level"[tiab]) NOT medline[sb])

### **#3 Publication types filter:**

NOT ("addresses"[Publication Type] OR "biography"[Publication Type] OR "comment"[Publication Type] OR "directory"[Publication Type] OR "editorial"[Publication Type] OR "festschrift"[Publication Type] OR "interview"[Publication Type] OR "lectures"[Publication Type] OR "legal cases"[Publication Type] OR "legislation"[Publication Type] OR "letter"[Publication Type] OR "news"[Publication Type] OR "newspaper article"[Publication Type] OR "patient education handout"[Publication Type] OR "popular works"[Publication Type] OR "congresses"[Publication Type] OR "consensus development conference"[Publication Type] OR "consensus development conference, nih"[Publication Type] OR "practice guideline"[Publication Type])

| Search | PubMed Query 15-01-2013                                                                                                                                                                                                                                                                                                                                                                                                                                                                                                                                                                                                                                                                                                                                                                                                                                                                                                                                                                                                                                                                                                                                                                                                                                                                                                                             | Items found |
|--------|-----------------------------------------------------------------------------------------------------------------------------------------------------------------------------------------------------------------------------------------------------------------------------------------------------------------------------------------------------------------------------------------------------------------------------------------------------------------------------------------------------------------------------------------------------------------------------------------------------------------------------------------------------------------------------------------------------------------------------------------------------------------------------------------------------------------------------------------------------------------------------------------------------------------------------------------------------------------------------------------------------------------------------------------------------------------------------------------------------------------------------------------------------------------------------------------------------------------------------------------------------------------------------------------------------------------------------------------------------|-------------|
| #6     | Search #4 AND #5                                                                                                                                                                                                                                                                                                                                                                                                                                                                                                                                                                                                                                                                                                                                                                                                                                                                                                                                                                                                                                                                                                                                                                                                                                                                                                                                    | 12          |
| #5     | Search 20493499[uid] OR 15997047[uid] OR 23049962[uid] OR 23251693[uid] OR 21167701[uid] OR 16234423[uid] OR 19064527[uid] OR 16404403[uid] OR 16339179[uid] OR 15469656[uid] OR 22595039[uid] OR 18761782[uid]                                                                                                                                                                                                                                                                                                                                                                                                                                                                                                                                                                                                                                                                                                                                                                                                                                                                                                                                                                                                                                                                                                                                     | 12          |
| #4     | Search #3 NOT ("addresses"[Publication Type] OR "biography"[Publication Type] OR "comment"[Publication Type] OR "directory"[Publication Type] OR "editorial"[Publication Type] OR "festschrift"[Publication Type] OR "interview"[Publication Type] OR "lectures"[Publication Type] OR "legal cases"[Publication Type] OR "legislation"[Publication Type] OR "letter"[Publication Type] OR "news"[Publication Type] OR "newspaper article"[Publication Type] OR "patient education handout"[Publication Type] OR "popular works"[Publication Type] OR "congresses"[Publication Type] OR "consensus development conference"[Publication Type] OR "consensus development conference, nih"[Publication Type] OR "practice guideline"[Publication Type])                                                                                                                                                                                                                                                                                                                                                                                                                                                                                                                                                                                                 | 2898        |
| #3     | Search #1 AND #2                                                                                                                                                                                                                                                                                                                                                                                                                                                                                                                                                                                                                                                                                                                                                                                                                                                                                                                                                                                                                                                                                                                                                                                                                                                                                                                                    | 3004        |
| #2     | Search "Exercise"[Majr:NoExp] OR "Running"[Mesh] OR "Swimming"[Mesh:noexp] OR "Walking"[Mesh:noexp] OR "Sports"[Mesh] OR "Life Style"[Mesh:NoExp] OR "Sedentary Lifestyle"[Mesh] OR "Appetite"[Mesh] OR "Health Behavior"[Majr:NoExp] OR "Feeding Behavior"[Mesh] OR "physical activity"[tiab] OR "appetit"[tiab] OR "satiety"[tiab] OR "childhood diet"[tiab] OR ((sport*[tiab] OR exercise*[tiab] OR "activity level"[tiab] OR "motor activity"[tiab] OR "locomotor activity"[tiab] OR "sedentary"[tiab] OR "sedentarism"[tiab] OR "sedentariness"[tiab] OR "physical inactivity"[tiab] OR "sitting"[tiab] OR "diet behavior"[tiab] OR "dietary behavior"[tiab] OR "feeding behavior"[tiab] OR "appetitive behavior"[tiab] OR "diet behaviour"[tiab] OR "dietary behaviour"[tiab] OR "feeding behaviour"[tiab] OR "appetitive behaviour"[tiab] OR "diet preference*[tiab] OR "dietary preference*[tiab] OR "feeding preference*[tiab] OR "diet habit*[tiab] OR "dietary habit*[tiab] OR "feeding habit*[tiab] OR "feeding practice*[tiab] OR "feeding practices*[tiab] OR "diet regulation"[tiab] OR "feeding regulation"[tiab] OR "diet control"[tiab] OR "dietary control"[tiab] OR "feeding control"[tiab] OR "hunger[tiab] OR "hyperphagia[tiab] OR "hyperphagic[tiab] OR "energy expenditure"[tiab] OR "energy level"[tiab]) NOT medline[sb] | 355277      |
| #1     | Search Birth weight[Mesh] OR "Infant, Low Birth Weight"[Mesh] OR "Prenatal Exposure Delayed Effects"[Mesh] OR dohad[tiab] OR (("Birth weight"[tiab] OR "Perinatal"[tiab] OR "infant growth"[tiab] OR "fetal"[tiab] OR "intra-uterine growth"[tiab] OR "infant programming"[tiab] OR "intra-uterine programming"[tiab] OR "developmental programming"[tiab] OR "intra-uterine plasticity"[tiab] OR "developmental plasticity"[tiab] OR "developmental origin*[tiab] OR "early-life origin*[tiab] OR "intra-uterine origin*[tiab] OR "developmental influence*[tiab] OR "early-life influence*[tiab] OR "intra-uterine influence*[tiab] OR "famine[tiab] OR "catch-up growth"[tiab] OR "accelerated growth"[tiab] OR "Small for Gestational Age"[tiab] OR "dysmaturity[tiab]) NOT medline[sb]                                                                                                                                                                                                                                                                                                                                                                                                                                                                                                                                                         | 80276       |

| Search | PunMed Query 03-07-2014                                                                                                                                                                                                                                                                                                                                                                                                                                                                                                                                                                                                                                                                                                                                                                                                                                                                                                                                                                                                                                                                                                                                                                                                                                                                                                                          | Items found |
|--------|--------------------------------------------------------------------------------------------------------------------------------------------------------------------------------------------------------------------------------------------------------------------------------------------------------------------------------------------------------------------------------------------------------------------------------------------------------------------------------------------------------------------------------------------------------------------------------------------------------------------------------------------------------------------------------------------------------------------------------------------------------------------------------------------------------------------------------------------------------------------------------------------------------------------------------------------------------------------------------------------------------------------------------------------------------------------------------------------------------------------------------------------------------------------------------------------------------------------------------------------------------------------------------------------------------------------------------------------------|-------------|
| #4     | Search #3 NOT ("addresses"[Publication Type] OR "biography"[Publication Type] OR "comment"[Publication Type] OR "directory"[Publication Type] OR "editorial"[Publication Type] OR "festschrift"[Publication Type] OR "interview"[Publication Type] OR "lectures"[Publication Type] OR "legal cases"[Publication Type] OR "legislation"[Publication Type] OR "letter"[Publication Type] OR "news"[Publication Type] OR "newspaper article"[Publication Type] OR "patient education handout"[Publication Type] OR "popular works"[Publication Type] OR "congresses"[Publication Type] OR "consensus development conference"[Publication Type] OR "consensus development conference, nih"[Publication Type] OR "practice guideline"[Publication Type])                                                                                                                                                                                                                                                                                                                                                                                                                                                                                                                                                                                              | 3275        |
| #3     | Search #1 AND #2                                                                                                                                                                                                                                                                                                                                                                                                                                                                                                                                                                                                                                                                                                                                                                                                                                                                                                                                                                                                                                                                                                                                                                                                                                                                                                                                 | 3392        |
| #2     | Search "Exercise"[Majr:NoExp] OR "Running"[Mesh] OR "Swimming"[Mesh:noexp] OR "Walking"[Mesh:noexp] OR "Sports"[Mesh] OR "Life Style"[Mesh:NoExp] OR "Sedentary Lifestyle"[Mesh] OR "Appetite"[Mesh] OR "Health Behavior"[Majr:NoExp] OR "Feeding Behavior"[Mesh] OR "physical activity"[tiab] OR "appetit*[tiab] OR "satiety[tiab] OR "childhood diet"[tiab] OR ((sport*[tiab] OR exercise*[tiab] OR "activity level"[tiab] OR "motor activity"[tiab] OR "locomotor activity"[tiab] OR "sedentary"[tiab] OR "sedentarism[tiab] OR "sedentariness[tiab] OR "physical inactivity"[tiab] OR "sitting"[tiab] OR "diet behavior"[tiab] OR "dietary behavior"[tiab] OR "feeding behavior"[tiab] OR "appetitive behavior"[tiab] OR "diet behaviour"[tiab] OR "dietary behaviour"[tiab] OR "feeding behaviour"[tiab] OR "appetitive behaviour"[tiab] OR "diet preference*[tiab] OR "dietary preference*[tiab] OR "feeding preference*[tiab] OR "diet habit*[tiab] OR "dietary habit*[tiab] OR "feeding habit*[tiab] OR "feeding practice"[tiab] OR "feeding practices"[tiab] OR "diet regulation"[tiab] OR "feeding regulation"[tiab] OR "diet control"[tiab] OR "dietary control"[tiab] OR "feeding control"[tiab] OR "hunger[tiab] OR "hyperphagia[tiab] OR "hyperphagic[tiab] OR "energy expenditure"[tiab] OR "energy level"[tiab]) NOT medline[sb] | 408780      |
| #1     | Search Birth weight[Mesh] OR "Infant, Low Birth Weight"[Mesh] OR "Prenatal Exposure Delayed Effects"[Mesh] OR dohad[tiab] OR (("Birth weight"[tiab] OR "Perinatal"[tiab] OR "infant growth"[tiab] OR "fetal"[tiab] OR "intra-uterine growth"[tiab] OR "infant programming"[tiab] OR "intra-uterine programming"[tiab] OR "developmental programming"[tiab] OR "intra-uterine plasticity"[tiab] OR "developmental plasticity"[tiab] OR "developmental origin*[tiab] OR "early-life origin*[tiab] OR "intra-uterine origin*[tiab] OR "developmental influence*[tiab] OR "early-life influence*[tiab] OR "intra-uterine influence*[tiab] OR "famine[tiab] OR "catch-up growth"[tiab] OR "accelerated growth"[tiab] OR "Small for Gestational Age"[tiab] OR "dysmaturity[tiab]) NOT medline[sb]                                                                                                                                                                                                                                                                                                                                                                                                                                                                                                                                                      | 89121       |

| Search | PubMed Query 19-05-2015                                                                                                                                                                                                                                                                                                                                                                                                                                                                                                                                                                                                                                                                                                                                                                                                                                                                                                                                                                                                                                                                                                                                                                                                                                                                                                              | Items found |
|--------|--------------------------------------------------------------------------------------------------------------------------------------------------------------------------------------------------------------------------------------------------------------------------------------------------------------------------------------------------------------------------------------------------------------------------------------------------------------------------------------------------------------------------------------------------------------------------------------------------------------------------------------------------------------------------------------------------------------------------------------------------------------------------------------------------------------------------------------------------------------------------------------------------------------------------------------------------------------------------------------------------------------------------------------------------------------------------------------------------------------------------------------------------------------------------------------------------------------------------------------------------------------------------------------------------------------------------------------|-------------|
| #4     | Search #3 NOT ("addresses"[Publication Type] OR "biography"[Publication Type] OR "comment"[Publication Type] OR "directory"[Publication Type] OR "editorial"[Publication Type] OR "festschrift"[Publication Type] OR "interview"[Publication Type] OR "lectures"[Publication Type] OR "legal cases"[Publication Type] OR "legislation"[Publication Type] OR "letter"[Publication Type] OR "news"[Publication Type] OR "newspaper article"[Publication Type] OR "patient education handout"[Publication Type] OR "popular works"[Publication Type] OR "congresses"[Publication Type] OR "consensus development conference"[Publication Type] OR "consensus development conference, nih"[Publication Type] OR "practice guideline"[Publication Type])                                                                                                                                                                                                                                                                                                                                                                                                                                                                                                                                                                                  | 3514        |
| #3     | Search #1 AND #2                                                                                                                                                                                                                                                                                                                                                                                                                                                                                                                                                                                                                                                                                                                                                                                                                                                                                                                                                                                                                                                                                                                                                                                                                                                                                                                     | 3640        |
| #2     | Search "Exercise"[Majr:NoExp] OR "Running"[Mesh] OR "Swimming"[Mesh:noexp] OR "Walking"[Mesh:noexp] OR "Sports"[Mesh] OR "Life Style"[Mesh:NoExp] OR "Sedentary Lifestyle"[Mesh] OR "Appetite"[Mesh] OR "Health Behavior"[Majr:NoExp] OR "Feeding Behavior"[Mesh] OR "physical activity"[tiab] OR appetit*[tiab] OR satiety[tiab] OR "childhood diet"[tiab] OR ((sport*[tiab] OR exercise*[tiab] OR "activity level"[tiab] OR "motor activity"[tiab] OR "locomotor activity"[tiab] OR "sedentary"[tiab] OR sedentarism[tiab] OR sedentariness[tiab] OR "physical inactivity"[tiab] OR "sitting"[tiab] OR "diet behavior"[tiab] OR "dietary behavior"[tiab] OR "feeding behavior"[tiab] OR "appetitive behavior"[tiab] OR "diet behaviour"[tiab] OR "dietary behaviour"[tiab] OR "feeding behaviour"[tiab] OR "appetitive behaviour"[tiab] OR diet preference*[tiab] OR dietary preference*[tiab] OR feeding preference*[tiab] OR diet habit*[tiab] OR dietary habit*[tiab] OR feeding habit*[tiab] OR "feeding practice"[tiab] OR "feeding practices"[tiab] OR "diet regulation"[tiab] OR "feeding regulation"[tiab] OR "diet control"[tiab] OR "dietary control"[tiab] OR "feeding control"[tiab] OR hunger[tiab] OR hyperphagia[tiab] OR hyperphagic[tiab] OR "energy expenditure"[tiab] OR "energy level"[tiab]) NOT medline[sb]) | 436156      |
| #1     | Search Birth weight[Mesh] OR "Infant, Low Birth Weight"[Mesh] OR "Prenatal Exposure Delayed Effects"[Mesh] OR dohad[tiab] OR (("Birth weight"[tiab] OR "Perinatal"[tiab] OR "infant growth"[tiab] OR "fetal"[tiab] OR "intra-uterine growth"[tiab] OR "infant programming"[tiab] OR "intra-uterine programming"[tiab] OR "developmental programming"[tiab] OR "intra-uterine plasticity"[tiab] OR "developmental plasticity"[tiab] OR developmental origin*[tiab] OR early-life origin*[tiab] OR intra-uterine origin*[tiab] OR developmental influence*[tiab] OR early-life influence*[tiab] OR intra-uterine influence*[tiab] OR famine[tiab] OR "catch-up growth"[tiab] OR "accelerated growth"[tiab] OR "Small for Gestational Age"[tiab] OR dysmaturity[tiab]) NOT medline[sb])                                                                                                                                                                                                                                                                                                                                                                                                                                                                                                                                                 | 94299       |

| Search | PubMed Query 05-01-2016                                                                                                                                                                                                                                                                                                                                                                                                                                                                                                                                                                                                                                                                                                                                                                                                                                                                                                                                                                                                                                                                                                                                                                                                                                                                                                              | Items found |
|--------|--------------------------------------------------------------------------------------------------------------------------------------------------------------------------------------------------------------------------------------------------------------------------------------------------------------------------------------------------------------------------------------------------------------------------------------------------------------------------------------------------------------------------------------------------------------------------------------------------------------------------------------------------------------------------------------------------------------------------------------------------------------------------------------------------------------------------------------------------------------------------------------------------------------------------------------------------------------------------------------------------------------------------------------------------------------------------------------------------------------------------------------------------------------------------------------------------------------------------------------------------------------------------------------------------------------------------------------|-------------|
| #52    | Search #51 NOT ("addresses"[Publication Type] OR "biography"[Publication Type] OR "comment"[Publication Type] OR "directory"[Publication Type] OR "editorial"[Publication Type] OR "festschrift"[Publication Type] OR "interview"[Publication Type] OR "lectures"[Publication Type] OR "legal cases"[Publication Type] OR "legislation"[Publication Type] OR "letter"[Publication Type] OR "news"[Publication Type] OR "newspaper article"[Publication Type] OR "patient education handout"[Publication Type] OR "popular works"[Publication Type] OR "congresses"[Publication Type] OR "consensus development conference"[Publication Type] OR "consensus development conference, nih"[Publication Type] OR "practice guideline"[Publication Type])                                                                                                                                                                                                                                                                                                                                                                                                                                                                                                                                                                                 | 3724        |
| #51    | Search #49 AND #50                                                                                                                                                                                                                                                                                                                                                                                                                                                                                                                                                                                                                                                                                                                                                                                                                                                                                                                                                                                                                                                                                                                                                                                                                                                                                                                   | 3855        |
| #50    | Search "Exercise"[Majr:NoExp] OR "Running"[Mesh] OR "Swimming"[Mesh:noexp] OR "Walking"[Mesh:noexp] OR "Sports"[Mesh] OR "Life Style"[Mesh:NoExp] OR "Sedentary Lifestyle"[Mesh] OR "Appetite"[Mesh] OR "Health Behavior"[Majr:NoExp] OR "Feeding Behavior"[Mesh] OR "physical activity"[tiab] OR appetit*[tiab] OR satiety[tiab] OR "childhood diet"[tiab] OR ((sport*[tiab] OR exercise*[tiab] OR "activity level"[tiab] OR "motor activity"[tiab] OR "locomotor activity"[tiab] OR "sedentary"[tiab] OR sedentarism[tiab] OR sedentariness[tiab] OR "physical inactivity"[tiab] OR "sitting"[tiab] OR "diet behavior"[tiab] OR "dietary behavior"[tiab] OR "feeding behavior"[tiab] OR "appetitive behavior"[tiab] OR "diet behaviour"[tiab] OR "dietary behaviour"[tiab] OR "feeding behaviour"[tiab] OR "appetitive behaviour"[tiab] OR diet preference*[tiab] OR dietary preference*[tiab] OR feeding preference*[tiab] OR diet habit*[tiab] OR dietary habit*[tiab] OR feeding habit*[tiab] OR "feeding practice"[tiab] OR "feeding practices"[tiab] OR "diet regulation"[tiab] OR "feeding regulation"[tiab] OR "diet control"[tiab] OR "dietary control"[tiab] OR "feeding control"[tiab] OR hunger[tiab] OR hyperphagia[tiab] OR hyperphagic[tiab] OR "energy expenditure"[tiab] OR "energy level"[tiab]) NOT medline[sb]) | 467128      |
| #49    | Search Birth weight[Mesh] OR "Infant, Low Birth Weight"[Mesh] OR "Prenatal Exposure Delayed Effects"[Mesh] OR dohad[tiab] OR (("Birth weight"[tiab] OR "Perinatal"[tiab] OR "infant growth"[tiab] OR "fetal"[tiab] OR "intra-uterine growth"[tiab] OR "infant programming"[tiab] OR "intra-uterine programming"[tiab] OR "developmental programming"[tiab] OR "intra-uterine plasticity"[tiab] OR "developmental plasticity"[tiab] OR developmental origin*[tiab] OR early-life origin*[tiab] OR intra-uterine origin*[tiab] OR developmental influence*[tiab] OR early-life influence*[tiab] OR intra-uterine influence*[tiab] OR famine[tiab] OR "catch-up growth"[tiab] OR "accelerated growth"[tiab] OR "Small for Gestational Age"[tiab] OR dysmaturity[tiab]) NOT medline[sb])                                                                                                                                                                                                                                                                                                                                                                                                                                                                                                                                                 | 98722       |

## **2. EMBASE.com**

### **#1 Perinatal influences/ DOHaD**

'birth weight'/exp OR 'prenatal exposure'/exp OR dohad:ti,ab OR 'Perinatal growth':ti,ab OR 'infant growth':ti,ab OR 'intra-uterine growth':ti,ab OR 'intra-uterine programming':ti,ab OR 'developmental programming':ti,ab OR 'developmental origin':ti,ab OR 'developmental origins':ti,ab OR 'early-life origin':ti,ab OR 'early-life origins':ti,ab OR 'catch-up growth':ti,ab OR 'accelerated growth':ti,ab OR 'Small for Gestational Age':ti,ab OR dysmaturity:ti,ab

### **#2 Energy-balance related behavior**

*Physical activity - Sedentary behavior - Eating behaviour*

'exercise'/mj OR 'physical activity'/exp OR 'laziness'/exp OR 'lifestyle'/exp OR 'sedentary lifestyle'/exp OR 'feeding behavior'/exp OR 'health behavior'/mj OR 'childhood diet':ti,ab OR hunger:ti,ab OR hyperphagia:ti,ab OR hyperphagic:ti,ab OR 'energy expenditure':ti,ab OR 'energy level':ti,ab

### **Embase Session Results (15 Jan 2013)**

| No. | Query                                                                                                                                                                                                                                                                                                                                                                                                                                        | Results |
|-----|----------------------------------------------------------------------------------------------------------------------------------------------------------------------------------------------------------------------------------------------------------------------------------------------------------------------------------------------------------------------------------------------------------------------------------------------|---------|
| #13 | #10 AND #11 AND ([article]/lim OR [article in press]/lim OR [review]/lim OR [short survey]/lim)                                                                                                                                                                                                                                                                                                                                              | 2356    |
| #12 | #10 AND #11                                                                                                                                                                                                                                                                                                                                                                                                                                  | 2915    |
| #11 | 'exercise'/mj OR 'physical activity'/exp OR 'laziness'/exp OR 'lifestyle'/exp OR 'sedentary lifestyle'/exp OR 'feeding behavior'/exp OR 'health behavior'/mj OR 'childhood diet':ab,ti OR hunger:ab,ti OR hyperphagia:ab,ti OR hyperphagic:ab,ti OR 'energy expenditure':ab,ti OR 'energy level':ab,ti                                                                                                                                       | 458090  |
| #10 | 'birth weight'/exp OR 'prenatal exposure'/exp OR dohad:ab,ti OR 'perinatal growth':ab,ti OR 'infant growth':ab,ti OR 'intra-uterine growth':ab,ti OR 'intra-uterine programming':ab,ti OR 'developmental programming':ab,ti OR 'developmental origin':ab,ti OR 'developmental origins':ab,ti OR 'early-life origin':ab,ti OR 'early-life origins':ab,ti OR 'catch-up growth':ab,ti OR 'small for gestational age':ab,ti OR dysmaturity:ab,ti | 89807   |

### **Embase Session Results (19 May 2015)**

| No. | Query                                                                                                                                                                                                                                                                                                                                                                                                                                                                      | Results |
|-----|----------------------------------------------------------------------------------------------------------------------------------------------------------------------------------------------------------------------------------------------------------------------------------------------------------------------------------------------------------------------------------------------------------------------------------------------------------------------------|---------|
| #4  | #3 AND ([article]/lim OR [article in press]/lim OR [review]/lim OR [short survey]/lim)                                                                                                                                                                                                                                                                                                                                                                                     | 2879    |
| #3  | #1 AND #2                                                                                                                                                                                                                                                                                                                                                                                                                                                                  | 3845    |
| #2  | 'exercise'/mj OR 'physical activity'/exp OR 'laziness'/exp OR 'lifestyle'/exp OR 'sedentary lifestyle'/exp OR 'feeding behavior'/exp OR 'health behavior'/mj OR 'childhood diet':ab,ti OR hunger:ab,ti OR hyperphagia:ab,ti OR hyperphagic:ab,ti OR 'energy expenditure':ab,ti OR 'energy level':ab,ti                                                                                                                                                                     | 559006  |
| #1  | 'birth weight'/exp OR 'prenatal exposure'/exp OR dohad:ab,ti OR 'perinatal growth':ab,ti OR 'infant growth':ab,ti OR 'intra-uterine growth':ab,ti OR 'intra-uterine programming':ab,ti OR 'developmental programming':ab,ti OR 'developmental origin':ab,ti OR 'developmental origins':ab,ti OR 'early-life origin':ab,ti OR 'early-life origins':ab,ti OR 'catch-up growth':ab,ti OR 'accelerated growth':ab,ti OR 'small for gestational age':ab,ti OR dysmaturity:ab,ti | 109366  |

## Embase Session Results (5 Jan 2016)

| No. | Query                                                                                                                                                                                                                                                                                                                                                                                                                                                                        | Results |
|-----|------------------------------------------------------------------------------------------------------------------------------------------------------------------------------------------------------------------------------------------------------------------------------------------------------------------------------------------------------------------------------------------------------------------------------------------------------------------------------|---------|
| #4  | #3 AND ([article]/lim OR [article in press]/lim OR [review]/lim OR [short survey]/lim)                                                                                                                                                                                                                                                                                                                                                                                       | 3061    |
| #3  | #1 AND #2                                                                                                                                                                                                                                                                                                                                                                                                                                                                    | 4094    |
| #2  | 'exercise'/mj OR 'physical activity'/exp OR 'laziness'/exp OR 'lifestyle'/exp OR 'sedentary lifestyle'/exp OR 'feeding behavior'/exp OR 'health behavior'/mj OR 'childhood diet':ab,ti OR hunger:ab,ti OR hyperphagia:ab,ti OR hyperphagic:ab,ti OR 'energy expenditure':ab,ti OR 'energy level':ab,ti                                                                                                                                                                       | 589756  |
| #1  | 'birth weight'/exp OR 'prenatal exposure'/exp OR dohad:ab,ti OR 'perinatal growth':ab,ti OR 'infant growth':ab,ti OR 'intra-uterine growth':ab,ti OR 'intra-uterine programming':ab,ti OR 'developmental programming':ab,ti OR 'developmental origin':ab,ti OR 'developmental origins':ab,ti OR 'early-life origin':ab,ti OR 'early-life origins':ab,ti OR 'catch-up growth':ab,ti OR 'accelerated growth':ab,ti OR 'small for gestational age':ab,ti OR 'dysmaturity':ab,ti | 114861  |

## 3. PsycINFO

### #1 Perinatal influences/ DOHaD

DE "Birth Weight" OR DE "Perinatal Period" OR DE "Prenatal Exposure" OR DE "Prenatal Development" OR TI dohad OR AB dohad OR TI "Perinatal growth" OR TI "infant growth" OR TI "intra-uterine growth" OR TI "intra-uterine programming" OR TI "developmental programming" OR TI "developmental origin" OR TI "developmental origins" OR TI "early-life origin" OR TI "early-life origins" OR TI "catch-up growth" OR TI "accelerated growth" OR TI "Small for Gestational Age" OR TI "dysmaturity" OR AB "Perinatal growth" OR AB "infant growth" OR AB "intra-uterine growth" OR AB "intra-uterine programming" OR AB "developmental programming" OR AB "developmental origin" OR AB "developmental origins" OR AB "early-life origin" OR AB "early-life origins" OR AB "catch-up growth" OR AB "accelerated growth" OR AB "Small for GestaABonal Age" OR AB "dysmaturity"

### #2 Energy-balance related behavior

*Physical acticity - Sedentary behavior - Eating behaviour*

DE "Exercise" OR DE "Activity Level" OR DE "Activities of Daily Living" OR DE "Motivation" OR DE "Physical Activity" OR DE "Diets" OR DE "Health Attitudes" OR DE "Lifestyle" OR DE "Active Living" OR DE "Health Behavior" OR DE "Swimming" OR DE "Sports" OR DE "Sports (Attitudes Toward)" OR DE "Motor Performance" OR DE "Jumping" OR DE "Running" OR DE "Walking" OR DE "Eating Behavior" OR DE "Binge Eating" OR DE "Appetite" OR DE "Eating Attitudes" OR DE "Food Intake" OR DE "Mealtimes" OR TI sedentar\* OR TI satiety OR TI hunger OR TI hyperphagia OR TI hyperphagic OR TI "energy expenditure" OR TI "energy level" OR AB sedentar\* OR AB satiety OR AB hunger OR AB hyperphagia OR AB hyperphagic OR AB "energy expenditure" OR AB "energy level"

### #3 Publication types filter:

Limiters - Publication Type: All Journals, Peer Reviewed Journal, Peer-Reviewed Status-Unknown; Document Type: Journal Article  
 Search modes - Boolean/Phrase

| #  | PsycINFO Query                                                                                                                                                                                                                                                                                                                                                                                                                                                                                                                                                                                                                                                                                                                                                                                                                                                              | Limiters/Expanders                                                                                                                                           | Results |
|----|-----------------------------------------------------------------------------------------------------------------------------------------------------------------------------------------------------------------------------------------------------------------------------------------------------------------------------------------------------------------------------------------------------------------------------------------------------------------------------------------------------------------------------------------------------------------------------------------------------------------------------------------------------------------------------------------------------------------------------------------------------------------------------------------------------------------------------------------------------------------------------|--------------------------------------------------------------------------------------------------------------------------------------------------------------|---------|
| S3 | (S1 AND S2)                                                                                                                                                                                                                                                                                                                                                                                                                                                                                                                                                                                                                                                                                                                                                                                                                                                                 | Limiters - Publication Type: All Journals, Peer Reviewed Journal, Peer-Reviewed Status-Unknown; Document Type: Journal Article Search modes - Boolean/Phrase | 493     |
| S2 | DE "Exercise" OR DE "Activity Level" OR DE "Activities of Daily Living" OR DE "Motivation" OR DE "Physical Activity" OR DE "Diets" OR DE "Health Attitudes" OR DE "Lifestyle" OR DE "Active Living" OR DE "Health Behavior" OR DE "Swimming" OR DE "Sports" OR DE "Sports (Attitudes Toward)" OR DE "Motor Performance" OR DE "Jumping" OR DE "Running" OR DE "Walking" OR DE "Eating Behavior" OR DE "Binge Eating" OR DE "Appetite" OR DE "Eating Attitudes" OR DE "Food Intake" OR DE "Mealtimes" OR TI sedentar* OR TI satiety OR TI hunger OR TI hyperphagia OR TI hyperphagic OR TI "energy expenditure" OR TI "energy level" OR AB sedentar* OR AB satiety OR AB hunger OR AB hyperphagia OR AB hyperphagic OR AB "energy expenditure" OR AB "energy level"                                                                                                          | Search modes - Boolean/Phrase                                                                                                                                | 133,188 |
| S1 | DE "Birth Weight" OR DE "Perinatal Period" OR DE "Prenatal Exposure" OR DE "Prenatal Development" OR TI dohad OR AB dohad OR TI "Perinatal growth" OR TI "infant growth" OR TI "intra-uterine growth" OR TI "intra-uterine programming" OR TI "developmental programming" OR TI "developmental origin" OR TI "developmental origins" OR TI "early-life origin" OR TI "early-life origins" OR TI "catch-up growth" OR TI "accelerated growth" OR TI "Small for Gestational Age" OR TI "dysmaturity" OR AB "Perinatal growth" OR AB "infant growth" OR AB "intra-uterine growth" OR AB "intra-uterine programming" OR AB "developmental programming" OR AB "developmental origin" OR AB "developmental origins" OR AB "early-life origin" OR AB "early-life origins" OR AB "catch-up growth" OR AB "accelerated growth" OR AB "Small for GestaABonal Age" OR AB "dysmaturity" | Search modes - Boolean/Phrase                                                                                                                                | 11,705  |

| #  | PsycINFO Query 03-07-2014                                                                                                                                                                                                                                                                                                                                                                                                                                                                                                                                                                                                                                                                                                                                                                                                                                                   | Limiters/Expanders                                                                                                                                           | Results |
|----|-----------------------------------------------------------------------------------------------------------------------------------------------------------------------------------------------------------------------------------------------------------------------------------------------------------------------------------------------------------------------------------------------------------------------------------------------------------------------------------------------------------------------------------------------------------------------------------------------------------------------------------------------------------------------------------------------------------------------------------------------------------------------------------------------------------------------------------------------------------------------------|--------------------------------------------------------------------------------------------------------------------------------------------------------------|---------|
| S3 | S1 AND S2                                                                                                                                                                                                                                                                                                                                                                                                                                                                                                                                                                                                                                                                                                                                                                                                                                                                   | Limiters - Publication Type: All Journals, Peer Reviewed Journal, Peer-Reviewed Status-Unknown; Document Type: Journal Article Search modes - Boolean/Phrase | 527     |
| S2 | DE "Exercise" OR DE "Activity Level" OR DE "Activities of Daily Living" OR DE "Motivation" OR DE "Physical Activity" OR DE "Diets" OR DE "Health Attitudes" OR DE "Lifestyle" OR DE "Active Living" OR DE "Health Behavior" OR DE "Swimming" OR DE "Sports" OR DE "Sports (Attitudes Toward)" OR DE "Motor Performance" OR DE "Jumping" OR DE "Running" OR DE "Walking" OR DE "Eating Behavior" OR DE "Binge Eating" OR DE "Appetite" OR DE "Eating Attitudes" OR DE "Food Intake" OR DE "Mealtimes" OR TI sedentar* OR TI satiety OR TI hunger OR TI hyperphagia OR TI hyperphagic OR TI "energy expenditure" OR TI "energy level" OR AB sedentar* OR AB satiety OR AB hunger OR AB hyperphagia OR AB hyperphagic OR AB "energy expenditure" OR AB "energy level"                                                                                                          | Search modes - Boolean/Phrase                                                                                                                                | 150,128 |
| S1 | DE "Birth Weight" OR DE "Perinatal Period" OR DE "Prenatal Exposure" OR DE "Prenatal Development" OR TI dohad OR AB dohad OR TI "Perinatal growth" OR TI "infant growth" OR TI "intra-uterine growth" OR TI "intra-uterine programming" OR TI "developmental programming" OR TI "developmental origin" OR TI "developmental origins" OR TI "early-life origin" OR TI "early-life origins" OR TI "catch-up growth" OR TI "accelerated growth" OR TI "Small for Gestational Age" OR TI "dysmaturity" OR AB "Perinatal growth" OR AB "infant growth" OR AB "intra-uterine growth" OR AB "intra-uterine programming" OR AB "developmental programming" OR AB "developmental origin" OR AB "developmental origins" OR AB "early-life origin" OR AB "early-life origins" OR AB "catch-up growth" OR AB "accelerated growth" OR AB "Small for GestaABonal Age" OR AB "dysmaturity" | Search modes - Boolean/Phrase                                                                                                                                | 12,832  |



| #  | PsyclINFO Query                                                                                                                                                                                                                                                                                                                                                                                                                                                                                                                                                                                                                                                                                                                                                                                                                                                             | Limiters/Expanders                                                                                                                                           | Results |
|----|-----------------------------------------------------------------------------------------------------------------------------------------------------------------------------------------------------------------------------------------------------------------------------------------------------------------------------------------------------------------------------------------------------------------------------------------------------------------------------------------------------------------------------------------------------------------------------------------------------------------------------------------------------------------------------------------------------------------------------------------------------------------------------------------------------------------------------------------------------------------------------|--------------------------------------------------------------------------------------------------------------------------------------------------------------|---------|
| S3 | S1 AND S2                                                                                                                                                                                                                                                                                                                                                                                                                                                                                                                                                                                                                                                                                                                                                                                                                                                                   | Limiters - Publication Type: All Journals, Peer Reviewed Journal, Peer-Reviewed Status-Unknown; Document Type: Journal Article Search modes - Boolean/Phrase | 548     |
| S2 | DE "Exercise" OR DE "Activity Level" OR DE "Activities of Daily Living" OR DE "Motivation" OR DE "Physical Activity" OR DE "Diets" OR DE "Health Attitudes" OR DE "Lifestyle" OR DE "Active Living" OR DE "Health Behavior" OR DE "Swimming" OR DE "Sports" OR DE "Sports (Attitudes Toward)" OR DE "Motor Performance" OR DE "Jumping" OR DE "Running" OR DE "Walking" OR DE "Eating Behavior" OR DE "Binge Eating" OR DE "Appetite" OR DE "Eating Attitudes" OR DE "Food Intake" OR DE "Mealtimes" OR TI sedentar* OR TI satiety OR TI hunger OR TI hyperphagia OR TI hyperphagic OR TI "energy expenditure" OR TI "energy level" OR AB sedentar* OR AB satiety OR AB hunger OR AB hyperphagia OR AB hyperphagic OR AB "energy expenditure" OR AB "energy level"                                                                                                          | Search modes - Boolean/Phrase                                                                                                                                | 161,474 |
| S1 | DE "Birth Weight" OR DE "Perinatal Period" OR DE "Prenatal Exposure" OR DE "Prenatal Development" OR TI dohad OR AB dohad OR TI "Perinatal growth" OR TI "infant growth" OR TI "intra-uterine growth" OR TI "intra-uterine programming" OR TI "developmental programming" OR TI "developmental origin" OR TI "developmental origins" OR TI "early-life origin" OR TI "early-life origins" OR TI "catch-up growth" OR TI "accelerated growth" OR TI "Small for Gestational Age" OR TI "dysmaturity" OR AB "Perinatal growth" OR AB "infant growth" OR AB "intra-uterine growth" OR AB "intra-uterine programming" OR AB "developmental programming" OR AB "developmental origin" OR AB "developmental origins" OR AB "early-life origin" OR AB "early-life origins" OR AB "catch-up growth" OR AB "accelerated growth" OR AB "Small for GestaABonal Age" OR AB "dysmaturity" | Search modes - Boolean/Phrase                                                                                                                                | 13,497  |

| #  | Query                                                                                                                                                                                                                                                                                                                                                                                                                                                                                                                                                                                                                                                                                                                                                                                                                                                                       | Limiters/Expanders                                                                                                                                           | Results |
|----|-----------------------------------------------------------------------------------------------------------------------------------------------------------------------------------------------------------------------------------------------------------------------------------------------------------------------------------------------------------------------------------------------------------------------------------------------------------------------------------------------------------------------------------------------------------------------------------------------------------------------------------------------------------------------------------------------------------------------------------------------------------------------------------------------------------------------------------------------------------------------------|--------------------------------------------------------------------------------------------------------------------------------------------------------------|---------|
| S3 | S1 AND S2                                                                                                                                                                                                                                                                                                                                                                                                                                                                                                                                                                                                                                                                                                                                                                                                                                                                   | Limiters - Publication Type: All Journals, Peer Reviewed Journal, Peer-Reviewed Status-Unknown; Document Type: Journal Article Search modes - Boolean/Phrase | 577     |
| S2 | DE "Exercise" OR DE "Activity Level" OR DE "Activities of Daily Living" OR DE "Motivation" OR DE "Physical Activity" OR DE "Diets" OR DE "Health Attitudes" OR DE "Lifestyle" OR DE "Active Living" OR DE "Health Behavior" OR DE "Swimming" OR DE "Sports" OR DE "Sports #Attitudes Toward#" OR DE "Motor Performance" OR DE "Jumping" OR DE "Running" OR DE "Walking" OR DE "Eating Behavior" OR DE "Binge Eating" OR DE "Appetite" OR DE "Eating Attitudes" OR DE "Food Intake" OR DE "Mealtimes" OR TI sedentar* OR TI satiety OR TI hunger OR TI hyperphagia OR TI hyperphagic OR TI "energy expenditure" OR TI "energy level" OR AB sedentar* OR AB satiety OR AB hunger OR AB hyperphagia OR AB hyperphagic OR AB "energy expenditure" OR AB "energy level"                                                                                                          | Search modes - Boolean/Phrase                                                                                                                                | 170,849 |
| S1 | DE "Birth Weight" OR DE "Perinatal Period" OR DE "Prenatal Exposure" OR DE "Prenatal Development" OR TI dohad OR AB dohad OR TI "Perinatal growth" OR TI "infant growth" OR TI "intra-uterine growth" OR TI "intra-uterine programming" OR TI "developmental programming" OR TI "developmental origin" OR TI "developmental origins" OR TI "early-life origin" OR TI "early-life origins" OR TI "catch-up growth" OR TI "accelerated growth" OR TI "Small for Gestational Age" OR TI "dysmaturity" OR AB "Perinatal growth" OR AB "infant growth" OR AB "intra-uterine growth" OR AB "intra-uterine programming" OR AB "developmental programming" OR AB "developmental origin" OR AB "developmental origins" OR AB "early-life origin" OR AB "early-life origins" OR AB "catch-up growth" OR AB "accelerated growth" OR AB "Small for GestaABonal Age" OR AB "dysmaturity" | Search modes - Boolean/Phrase                                                                                                                                | 14,068  |

## **4. Cochrane**

### **#1 Perinatal influences/ DOHaD**

Birth weight OR "Prenatal Exposure" OR dohad OR "Perinatal" OR "infant growth" OR "intra-uterine growth" OR "infant programming" OR "fetal programming" OR "intra-uterine programming" OR "developmental programming" OR "intra-uterine plasticity" OR "developmental plasticity" OR "developmental origin" OR "developmental origins" OR "early-life origin" OR "early-life origins" OR "catch-up growth" OR "Small for Gestational Age" OR dysmaturity OR "accelerated growth"

### **#2 Energy-balance related behavior**

*Physical activity - Sedentary behavior - Eating behaviour*

"Running" OR "Swimming" OR "Walking" OR "Sports" OR "Life Style" OR "Sedentary Lifestyle" OR "Appetite" OR "Health Behavior" OR "Feeding Behavior" OR "physical activity" OR appetit\* OR satiety OR "childhood diet" OR sport\* OR exercise\* OR "activity level" OR "motor activity" OR "locomotor activity" OR "sedentary" OR sedentarism OR sedentariness OR "physical inactivity" OR "sitting" OR "diet behavior" OR "dietary behavior" OR "feeding behavior" OR "appetitive behavior" OR "diet behaviour" OR "dietary behaviour" OR "feeding behaviour" OR "appetitive behaviour" OR "diet preference" OR "diet preferences" OR "dietary preference" OR "dietary preferences" OR "feeding preference" OR "feeding preferences" OR "feeding practice" OR "feeding practices" OR "diet regulation" OR "feeding regulation" OR "diet control" OR "dietary control" OR "feeding control" OR hunger OR hyperphagia OR hyperphagic OR "energy expenditure" OR "energy level"

Search Name:

Date Run: 03/07/14 11:39:10.627

Description:

| ID | Search Hits                                                                                                                                                                                                                                                                                                                                                                                                                                                                                                                                                                                                                                                                                                                                                                                                                                                                                                                                                                                                                   |
|----|-------------------------------------------------------------------------------------------------------------------------------------------------------------------------------------------------------------------------------------------------------------------------------------------------------------------------------------------------------------------------------------------------------------------------------------------------------------------------------------------------------------------------------------------------------------------------------------------------------------------------------------------------------------------------------------------------------------------------------------------------------------------------------------------------------------------------------------------------------------------------------------------------------------------------------------------------------------------------------------------------------------------------------|
| #1 | Birth weight or "Prenatal Exposure" or dohad or "Perinatal" or "infant growth" or "intra-uterine growth" or "infant programming" or "fetal programming" or "intra-uterine programming" or "developmental programming" or "intra-uterine plasticity" or "developmental plasticity" or "developmental origin" or "developmental origins" or "early-life origin" or "early-life origins" or "catch-up growth" or "Small for Gestational Age" or dysmaturity or "accelerated growth":ti,ab,kw (Word variations have been searched) 7966                                                                                                                                                                                                                                                                                                                                                                                                                                                                                           |
| #2 | "Running" or "Swimming" or "Walking" or "Sports" or "Life Style" or "Sedentary Lifestyle" or "Appetite" or "Health Behavior" or "Feeding Behavior" or "physical activity" or appetit* or satiety or "childhood diet" or sport* or exercise* or "activity level" or "motor activity" or "locomotor activity" or "sedentary" or sedentarism or sedentariness or "physical inactivity" or "sitting" or "diet behavior" or "dietary behavior" or "feeding behavior" or "appetitive behavior" or "diet behaviour" or "dietary behaviour" or "feeding behaviour" or "appetitive behaviour" or "diet preference" or "diet preferences" or "dietary preference" or "dietary preferences" or "feeding preference" or "feeding preferences" or "feeding practice" or "feeding practices" or "diet regulation" or "feeding regulation" or "diet control" or "dietary control" or "feeding control" or hunger or hyperphagia or hyperphagic or "energy expenditure" or "energy level":ti,ab,kw (Word variations have been searched) 68198 |
| #3 | #1 and #2 402                                                                                                                                                                                                                                                                                                                                                                                                                                                                                                                                                                                                                                                                                                                                                                                                                                                                                                                                                                                                                 |

Search Name:

Date Run: 19/05/15 12:18:28.74

Description:

ID Search Hits

#1 Birth weight or "Prenatal Exposure" or dohad or "Perinatal" or "infant growth" or "intra-uterine growth" or "infant programming" or "fetal programming" or "intra-uterine programming" or "developmental programming" or "intra-uterine plasticity" or "developmental plasticity" or "developmental origin" or "developmental origins" or "early-life origin" or "early-life origins" or "catch-up growth" or "Small for Gestational Age" or dysmaturity or "accelerated growth":ti,ab,kw (Word variations have been searched)

8890

#2 "Running" or "Swimming" or "Walking" or "Sports" or "Life Style" or "Sedentary Lifestyle" or "Appetite" or "Health Behavior" or "Feeding Behavior" or "physical activity" or appetit\* or satiety or "childhood diet" or sport\* or exercise\* or "activity level" or "motor activity" or "locomotor activity" or "sedentary" or sedentarism or sedentariness or "physical inactivity" or "sitting" or "diet behavior" or "dietary behavior" or "feeding behavior" or "appetitive behavior" or "diet behaviour" or "dietary behaviour" or "feeding behaviour" or "appetitive behaviour" or "diet preference" or "diet preferences" or "dietary preference" or "dietary preferences" or "feeding preference" or "feeding preferences" or "feeding practice" or "feeding practices" or "diet regulation" or "feeding regulation" or "diet control" or "dietary control" or "feeding control" or hunger or hyperphagia or hyperphagic or "energy expenditure" or "energy level":ti,ab,kw (Word variations have been searched)

76603

#3 #1 and #2

482

Search Name:

Date Run: 05/01/16 14:45:21.756

Description:

ID Search Hits

#1 Birth weight or "Prenatal Exposure" or dohad or "Perinatal" or "infant growth" or "intra-uterine growth" or "infant programming" or "fetal programming" or "intra-uterine programming" or "developmental programming" or "intra-uterine plasticity" or "developmental plasticity" or "developmental origin" or "developmental origins" or "early-life origin" or "early-life origins" or "catch-up growth" or "Small for Gestational Age" or dysmaturity or "accelerated growth":ti,ab,kw (Word variations have been searched)

9571

#2 "Running" or "Swimming" or "Walking" or "Sports" or "Life Style" or "Sedentary Lifestyle" or "Appetite" or "Health Behavior" or "Feeding Behavior" or "physical activity" or appetit\* or satiety or "childhood diet" or sport\* or exercise\* or "activity level" or "motor activity" or "locomotor activity" or "sedentary" or sedentarism or sedentariness or "physical inactivity" or "sitting" or "diet behavior" or "dietary behavior" or "feeding behavior" or "appetitive behavior" or "diet behaviour" or "dietary behaviour" or "feeding behaviour" or "appetitive behaviour" or "diet preference" or "diet preferences" or "dietary preference" or "dietary preferences" or "feeding preference" or "feeding preferences" or "feeding practice" or "feeding practices" or "diet regulation" or "feeding regulation" or "diet control" or "dietary control" or "feeding control" or hunger or hyperphagia or hyperphagic or "energy expenditure" or "energy level":ti,ab,kw (Word variations have been searched)

83424

#3 #1 and #2

545
